# Supplementary material
Source: Springer Nature journal article supplement (https://www.springermedizin.de/resource/supplementary/12985_2014_2511_MOESM1_ESM.pdf/9606904)
Supplement: MOESM1 [file 9606904]

| Sample                       | Specie                                         | Location           | Number of tested samples |
|------------------------------|------------------------------------------------|--------------------|--------------------------|
| <b>Arvino</b>                | <i>V. vinifera</i>                             | Valle d'Aosta (IT) | 20                       |
| <b>Dolcetto</b>              | <i>V. vinifera</i>                             | Valle d'Aosta (IT) | 3                        |
| <b>Fumin</b>                 | <i>V. vinifera</i>                             | Valle d'Aosta (IT) | 1                        |
| <b>Petit Rouge</b>           | <i>V. vinifera</i>                             | Valle d'Aosta (IT) | 9                        |
| <b>Vien de Nus</b>           | <i>V. vinifera</i>                             | Valle d'Aosta (IT) | 3                        |
| <b>Barbera</b>               | <i>V. vinifera</i>                             | Piemonte (IT)      | 1                        |
| <b>Bonarda</b>               | <i>V. vinifera</i>                             | Piemonte (IT)      | 1                        |
| <b>Brachetto</b>             | <i>V. vinifera</i>                             | Piemonte (IT)      | 2                        |
| <b>Cabernet Sauvignon</b>    | <i>V. vinifera</i>                             | Piemonte (IT)      | 1                        |
| <b>Croatina</b>              | <i>V. vinifera</i>                             | Piemonte (IT)      | 1                        |
| <b>Dolcetto</b>              | <i>V. vinifera</i>                             | Piemonte (IT)      | 4                        |
| <b>Freisa</b>                | <i>V. vinifera</i>                             | Piemonte (IT)      | 1                        |
| <b>Grignolino</b>            | <i>V. vinifera</i>                             | Piemonte (IT)      | 1                        |
| <b>Lumassina</b>             | <i>V. vinifera</i>                             | Piemonte (IT)      | 1                        |
| <b>Malvasia</b>              | <i>V. vinifera</i>                             | Piemonte (IT)      | 1                        |
| <b>Moscato</b>               | <i>V. vinifera</i>                             | Piemonte (IT)      | 4                        |
| <b>Nebbiolo</b>              | <i>V. vinifera</i>                             | Piemonte (IT)      | 12                       |
| <b>Sangiovese</b>            | <i>V. vinifera</i>                             | Piemonte (IT)      | 2                        |
| <b>Timorasso</b>             | <i>V. vinifera</i>                             | Piemonte (IT)      | 1                        |
| <b>Vespolina</b>             | <i>V. vinifera</i>                             | Piemonte (IT)      | 1                        |
| <b><i>V. berlandieri</i></b> | <i>V. berlandieri</i>                          | Piemonte (IT)      | 1                        |
| <b><i>V. aestivalis</i></b>  | <i>V. aestivalis</i>                           | Piemonte (IT)      | 1                        |
| <b><i>V. amurensis</i></b>   | <i>V. amurensis</i>                            | Piemonte (IT)      | 1                        |
| <b><i>V. candicans</i></b>   | <i>V. candicans</i>                            | Piemonte (IT)      | 1                        |
| <b><i>V. cinerea</i></b>     | <i>V. cinerea</i>                              | Piemonte (IT)      | 1                        |
| <b><i>V. coignetia</i></b>   | <i>V. coignetia</i>                            | Piemonte (IT)      | 1                        |
| <b><i>V. rupestris</i></b>   | <i>V. rupestris</i>                            | Piemonte (IT)      | 1                        |
| <b><i>V. solonis</i></b>     | <i>V. solonis</i>                              | Piemonte (IT)      | 1                        |
| <b><i>V. silvestris</i></b>  | <i>V. vinifera</i> L. subsp. <i>silvestris</i> | Piemonte (IT)      | 6                        |
| <b>3309</b>                  | <i>V. riparia</i> x <i>V. rupestris</i>        | Piemonte (IT)      | 1                        |
| <b>101-14</b>                | <i>V. riparia</i> x <i>V. rupestris</i>        | Piemonte (IT)      | 1                        |
| <b>1103 P</b>                | <i>V. berlandieri</i> x <i>V. rupestris</i>    | Piemonte (IT)      | 1                        |
| <b>110R</b>                  | <i>V. berlandieri</i> x <i>V. rupestris</i>    | Piemonte (IT)      | 1                        |
| <b>140 RU</b>                | <i>V. berlandieri</i> x <i>V. rupestris</i>    | Piemonte (IT)      | 1                        |

| Sample                      | Specie                                      | Location      | Number of tested samples |
|-----------------------------|---------------------------------------------|---------------|--------------------------|
| <b>161-49</b>               | <i>V. berlandieri</i> x <i>V. rupestris</i> | Piemonte (IT) | 1                        |
| <b>420A</b>                 | <i>V. berlandieri</i> x <i>V. rupestris</i> | Piemonte (IT) | 1                        |
| <b>779P</b>                 | <i>V. berlandieri</i> x <i>V. rupestris</i> | Piemonte (IT) | 1                        |
| <b>Cosmo 2</b>              | <i>V. berlandieri</i> x <i>V. rupestris</i> | Piemonte (IT) | 1                        |
| <b>Gravesac</b>             | <i>V. riparia</i> x <i>V. rupestris</i>     | Piemonte (IT) | 1                        |
| <b>Kober 5BB</b>            | <i>V. berlandieri</i> x <i>V. rupestris</i> | Piemonte (IT) | 1                        |
| <b>Albarola</b>             | <i>V. vinifera</i>                          | Liguria (IT)  | 1                        |
| <b>Bosco</b>                | <i>V. vinifera</i>                          | Liguria (IT)  | 4                        |
| <b>Vermentino</b>           | <i>V. vinifera</i>                          | Liguria (IT)  | 1                        |
| <b>Marzemino</b>            | <i>V. vinifera</i>                          | Trentino (IT) | 3                        |
| <b>Müller Thurgau</b>       | <i>V. vinifera</i>                          | Trentino (IT) | 6                        |
| <b>Pinot nero</b>           | <i>V. vinifera</i>                          | Trentino (IT) | 2                        |
| <b>Schiava grossa</b>       | <i>V. vinifera</i>                          | Trentino (IT) | 2                        |
| <b>101-14</b>               | <i>V. riparia</i> x <i>V. rupestris</i>     | Trentino (IT) | 1                        |
| <b>110R</b>                 | <i>V. berlandieri</i> x <i>V. rupestris</i> | Trentino (IT) | 1                        |
| <b>Arvino</b>               | <i>V. vinifera</i>                          | Calabria (IT) | 1                        |
| <b>Gaglioppo</b>            | <i>V. vinifera</i>                          | Calabria (IT) | 7                        |
| <b>Magliocco</b>            | <i>V. vinifera</i>                          | Calabria (IT) | 3                        |
| <b>Pecorello</b>            | <i>V. vinifera</i>                          | Calabria (IT) | 2                        |
| <b>1103 P</b>               | <i>V. berlandieri</i> x <i>V. rupestris</i> | Marche (IT)   | 2                        |
| <b>420A</b>                 | <i>V. berlandieri</i> x <i>V. rupestris</i> | Marche (IT)   | 4                        |
| <b>Doukkali</b>             | <i>V. vinifera</i>                          | Algeria       | 1                        |
| <b>Siegerrebe</b>           | <i>V. vinifera</i>                          | Germany       | 1                        |
| <b>White muscat</b>         | <i>V. vinifera</i>                          | Germany       | 1                        |
| <b>White muscat</b>         | <i>V. vinifera</i>                          | Portugal      | 1                        |
| <b>Muscat of Alexandria</b> | <i>V. vinifera</i>                          | Portugal      | 1                        |
| <b>Beba</b>                 | <i>V. vinifera</i>                          | Portugal      | 1                        |
| <b>Muscat of Alexandria</b> | <i>V. vinifera</i>                          | Portugal      | 1                        |
| <b>Caracol</b>              | <i>V. vinifera</i>                          | Portugal      | 1                        |
| <b>White muscat</b>         | <i>V. vinifera</i>                          | Greece        | 1                        |
| <b>Incrocio Pirovano 1</b>  | <i>V. vinifera</i>                          | Cyprus        | 1                        |
| <b>Lapithiotiko</b>         | <i>V. vinifera</i>                          | Cyprus        | 1                        |
| <b>Muscat Susanna</b>       | <i>V. vinifera</i>                          | Armenia       | 1                        |
| <b>Muskat Armyanski</b>     | <i>V. vinifera</i>                          | Armenia       | 1                        |
| <b>Muscat Ottonel</b>       | <i>V. vinifera</i>                          | Slovakia      | 1                        |
| <b>White muscat</b>         | <i>V. vinifera</i>                          | Romania       | 1                        |
| <b>Rkatsiteli</b>           | <i>V. vinifera</i>                          | France        | 2                        |
